# Supplementary material
Source: PubMed Central journal article supplement (PMC5756068)
Supplement: NIHMS6322-supplement-1.pdf [file NIHMS6322-supplement-1.pdf]

## Supplementary Information

### Pooled screening for anti-proliferative inhibitors of protein-protein interactions

Satra Nim<sup>1,\*</sup>, Jouhyun Jeon<sup>1,\*</sup>, Carles Corbi<sup>1</sup>, Moon-Hyeong Seo<sup>1</sup>, Ylva Ivarsson<sup>2</sup>, Nadya Tarasova<sup>3</sup>, Jason Moffat<sup>1,4</sup>, and Philip M. Kim<sup>1,4,5¶</sup>

<sup>1</sup>Terrence Donnelly Centre for Cellular and Biomolecular Research, <sup>4</sup>Department of Molecular Genetics, <sup>5</sup>Department of Computer Science, University of Toronto, Toronto, ON M5S 3E1, Canada

<sup>2</sup>Department of Chemistry, BMC, Uppsala University, Uppsala, Sweden

<sup>3</sup>Cancer and Inflammation Program, Center for Cancer Research, National Cancer Institute – Frederick, Frederick, MD 21702, USA

¶ To whom correspondence should be addressed.

Tel: +1 416 946 3419; Fax: +1 416 978 8287;

Email: pi@kimlab.org

\*These authors contributed equally to this work

**This PDF file includes:**

Supplementary Tables. 1, 2 and 3

Supplementary Figures. 1 to 11

Supplementary Datasets. 1, 2, and 3

## Supplementary Tables

**Supplementary Table 1.** Summary of high-throughput screen.

| Time | RWP1             |                      |                            | HEK293T          |                      |                            |
|------|------------------|----------------------|----------------------------|------------------|----------------------|----------------------------|
|      | Number of reads* | Number of peptides** | Number of reads/peptide*** | Number of reads* | Number of peptides** | Number of reads/peptide*** |
| T0   | 9596819          | 50290                | 71.04                      | 11874786         | 50330                | 87.56                      |
| T1   | 9147277          | 50069                | 68.03                      | 9446511          | 50099                | 70.20                      |
| T2   | 11219646         | 50148                | 83.36                      | 10215684         | 48530                | 78.33                      |
| T3   | 7892054          | 49763                | 59.02                      | 9053584          | 48771                | 69.10                      |

\* Total number of reads identified from three replicates

\*\* Average number of peptides that are identified in each replicates

\*\*\* Average number of reads per peptide that are identified in each replicate

Supplementary Table 2. Experimental validation of effect of peptides on cell viability.

| Peptide  | Peptide Sequence | Type            | Structural region                         |                                            | Dropout Score (RWP1) | Dropout Score (HEK293T) | Cell viability at Day 3 |         |       |                                       |          |         |
|----------|------------------|-----------------|-------------------------------------------|--------------------------------------------|----------------------|-------------------------|-------------------------|---------|-------|---------------------------------------|----------|---------|
|          |                  |                 | Disordered regions*                       | Linear motif**                             |                      |                         | Estimation***           |         |       | Infection (Average cell viability, %) |          |         |
|          |                  |                 |                                           |                                            |                      |                         | RWP1                    | HEK293T | RWP1  | MiaPaCa                               | Panc0203 | HEK293T |
| ILF3     | SGNSVCL          | Cancer-specific | VCL are disordered                        | LIG_BIR_II_1, LIG_PDZ_Class_2              | -10.01               | 0.32                    | 69.16                   | 97.26   | 83.79 | 100.08                                | 84.25    | 88.03   |
| P53/MDM2 | ETFSDLW          | Cancer-specific | Disordered region, ETF are disordered     | -                                          | -11.61               | 0.40                    | 64.71                   | 108.15  | 83.29 | 75.30                                 | 79.97    | 86.58   |
| INCENP   | AYSLLKH          | Cancer-specific | -                                         | LIG_BIR_II_1                               | -6.78                | 0.21                    | 81.53                   | 102.85  | 65.96 | 85.08                                 | 81.41    | 91.71   |
| MUS81    | CSYGPLT          | Cancer-specific | LT are disordered                         | -                                          | -4.85                | 0.52                    | 87.53                   | 104.94  | 64.53 | 82.95                                 | 81.01    | 89.41   |
| p53/SFN  | TEGPDSD          | Cancer-specific | Disordered region, TEGPDSD are disordered | -                                          | -5.74                | 0.95                    | 87.81                   | 108.63  | 73.14 | 74.85                                 | 79.96    | 94.51   |
| GNG4     | KFFCTL           | Cancer-specific | -                                         | LIG_PDZ_Class_1                            | -6.40                | -0.05                   | 79.01                   | 104.88  | 83.09 | 93.86                                 | 85.64    | 97.99   |
| SLCO1A2  | DELKTKL          | Cancer-specific | Disordered region, DELKTKL are disordered | LIG_PDZ_Class_1                            | -9.34                | 0.38                    | 72.43                   | 102.12  | 94.57 | 81.24                                 | 81.97    | 100.02  |
| DEFB136  | AKDPVVH          | Cancer-specific | AKDPVVH are disordered                    | LIG_AP2alpha_2, LIG_BIR_II_1               | -10.40               | 0.10                    | 68.92                   | 97.13   | 83.27 | 98.34                                 | 92.23    | 99.80   |
| PREP     | DNFEGEY          | Cancer-specific | -                                         | LIG_AP2alpha_2, LIG_BIR_II_1               | -9.62                | 0.33                    | 72.68                   | 109.25  | 70.91 | 82.10                                 | 82.30    | 81.28   |
| OTOA     | SSSRSPA          | Cancer-specific | Disordered region, SSSRSPA are disordered | LIG_PDZ_Class_1, LIG_BIR_II_1              | -11.09               | -0.54                   | 64.86                   | 103.40  | 79.57 | 73.95                                 | 85.76    | 84.81   |
| DPY19L2  | YRVLKVN          | Normal-specific | -                                         | DOC_CYCLIN_1                               | -0.98                | -3.43                   | 93.63                   | 82.91   | 93.97 | 88.40                                 | 94.43    | 81.48   |
| EIF4B    | PKLNLKP          | Normal-specific | Disordered region, PKLNLKP are disordered | -                                          | -0.98                | -3.15                   | 90.65                   | 86.81   | 96.61 | 99.83                                 | 94.20    | 90.90   |
| TMEM25   | SSDEIWL          | Normal-specific | SDEIW are disordered                      | LIG_BIR_II_1, LIG_PDZ_Class_2              | 0.95                 | -3.18                   | 105.94                  | 82.62   | 94.21 | 82.30                                 | 76.10    | 85.52   |
| ATL1     | SEEEEPV          | Normal-specific | Disordered region, SEEEEPV are disordered | LIG_BIR_II_1, LIG_PDZ_Class_3, LIG_TRAF2_1 | 0.60                 | -2.77                   | 105.42                  | 86.81   | 91.25 | 96.78                                 | 96.70    | 85.92   |
| MTMR2    | TSSSERA          | Normal-specific | Disordered region, TSSSERA are disordered | LIG_PDZ_Class_3                            | 0.93                 | -2.66                   | 99.94                   | 90.85   | 95.52 | 100.38                                | 93.05    | 78.42   |

\* Disordered regions are defined as segments of at least 10 disordered residues. Disordered residues are identified using DISOPRED2 (<http://bioinf.cs.ucl.ac.uk/psipred/?disopred=1>)

\*\* Elm names (<http://elm.eu.org>) are shown as linear motifs (probability < 0.005)

\*\*\* Cell viability at day 3 is estimated using polynomial regression

**Supplementary Table 3.** Structures and analytical data of peptides used in the studies.

| Peptide  | Peptide structure                 | Theoretical molecular mass | Molecular mass determined by LC/MS* |
|----------|-----------------------------------|----------------------------|-------------------------------------|
| ILF3-1   | Pal-LRVSGNSVCL-OH                 | 1285.74                    | 1285.8                              |
| CTLA4-1  | Pal- KQFQPYFIPIN-NH <sub>2</sub>  | 1632.14                    | 1632                                |
| GCHFR-1  | Pal-VGQTLVWCLHKE-NH <sub>2</sub>  | 1650.17                    | 1649.4                              |
| TGFBR3-1 | Pal-TQSTPCSSSSTA-OH               | 1394.69                    | 1394.7                              |
| GNG4-1   | Pal-NPFREKKFFCTIL-NH <sub>2</sub> | 1880.49                    | 1880.6                              |
| GNG4-2   | Pal-CFLFNERPKIKFT-NH <sub>2</sub> | 1880.49                    | 1879.9                              |
| MUS81-1  | Pal-RTLSQLYCSYGPLT-OH             | 1840.35                    | 1840                                |
| MUS81-2  | Pal-CLRGTYLPQYTSLS-OH             | 1840.35                    | 1840                                |
| MUS81-3  | Ac-RTLSQLYCSYGPLT-OH              | 1643.85                    | 1643.2                              |
| MUS81-4  | Ac-CLRGSYLPQYTSLT-OH              | 1643.85                    | 1643.2                              |
| TRAF2-1  | Pal-IFIKAIVDLTGL-NH <sub>2</sub>  | 1540.12                    | 1539.6                              |
| INCENP-1 | Pal-PSSLAYSLKKH-OH                | 1468.93                    | 1468.2                              |
| INCENP-2 | Pal-SHKLSPKSYLA-OH                | 1468.93                    | 1468.2                              |
| INCENP-3 | Ac-PSSLAYSLKKH-OH                 | 1272.43                    | 1272                                |
| INCENP-4 | Ac-SHKLSPKAYLS-OH                 | 1272.43                    | 1272                                |

\*Molecular masses were determined using Agilent 6100 LC/MS spectrometer.

Scrambled peptides of GNG4, MUS81 and INCENP are represented as GNG4-2, MUS81-2/MUS81-4 and INCENP-2/INCENP-4.

## Supplementary Figures

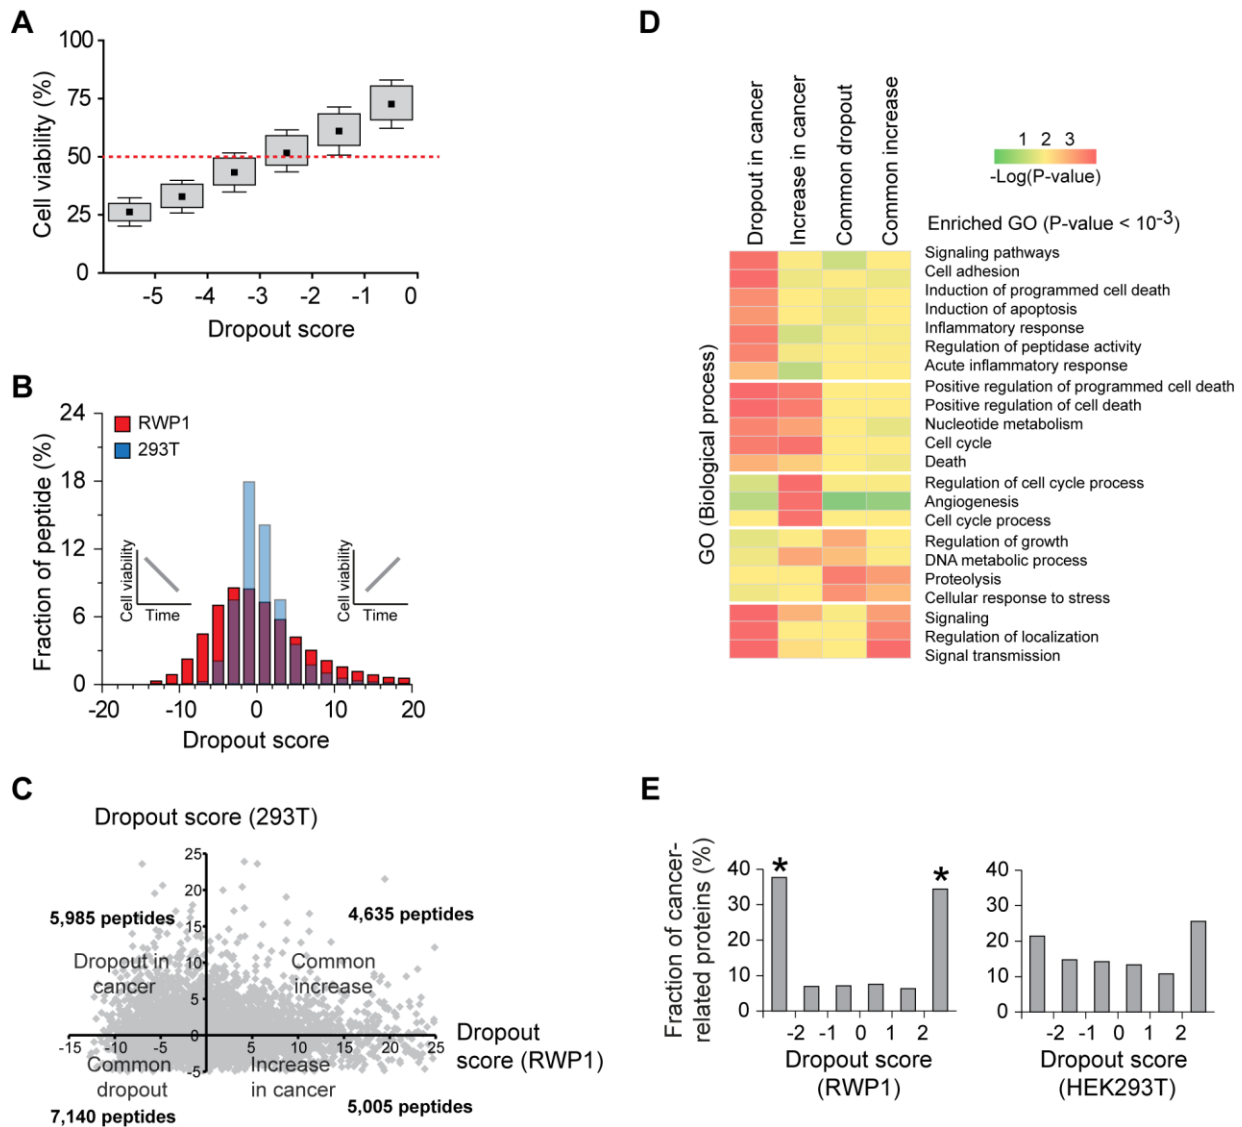

**Supplementary Fig. 1. Biological properties of c-terminal peptides.** (A) The change of cell viability depending on dropout score. Data represent mean values  $\pm$  s.d. (B) Dropout score distribution in RWP1 and HEK293T cells. (C) Comparison of dropout scores in RWP1 and HEK293T cells. (D) Functional enrichment of proteins hosting the peptides that lead to specific regulation of cell viability. (E) Cancer association of peptides. \* P-value < 0.0001.

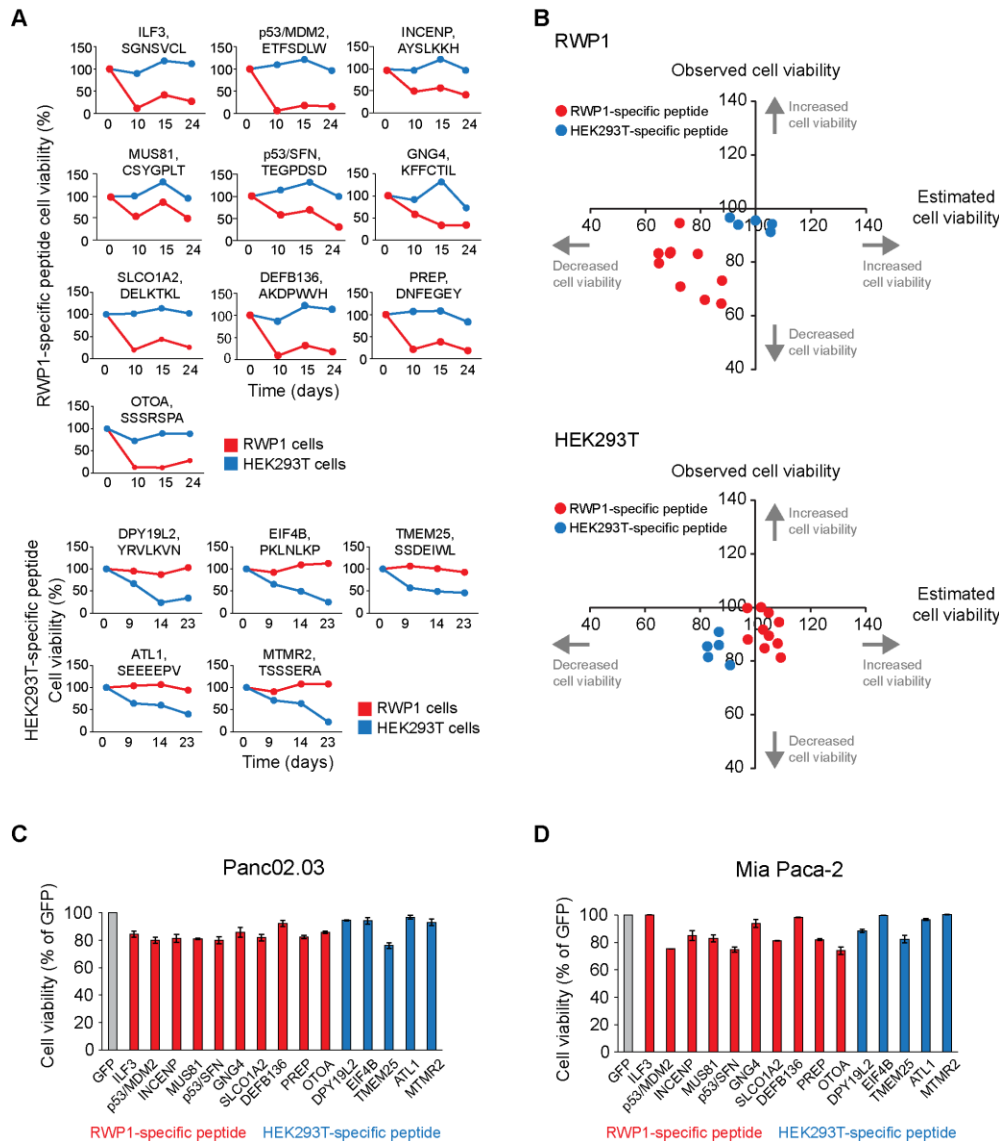

**Supplementary Fig. 2. Experimental validation of the effect of peptides on cell viability.** (A)

Time-dependent changes of cell viabilities. Cell viabilities are measured based on pooled screens. Source proteins and peptide sequences are shown. (B) Scatter plot showing correlations of the effects on cell viability of the pooled (estimated cell viability) and single peptide assays (observed cell viability). The correlations of the quantitative cell viability effects between the pooled and single peptide assays are 0.33 for HEK293T and 0.37 for RWP1. Experimental validation of the effect of peptides on cell viability in single-lentivirus infection experiments in Panc02.03 (C) and Mia Paca-2 (D) cell lines. Red bars represent cancer (RWP1)-specific peptides and blue bars represent normal (HEK293T)-specific peptides. Experiments were done in triplicate. Data represent mean values  $\pm$  s.d.

**A**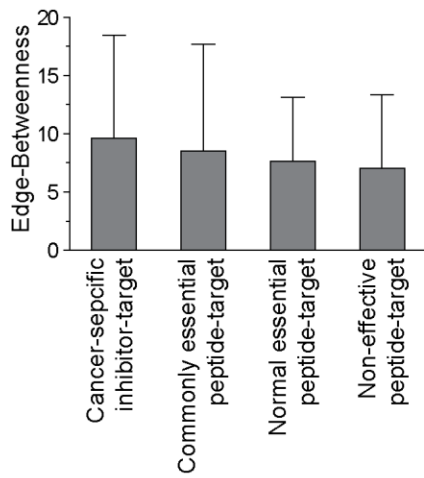**B**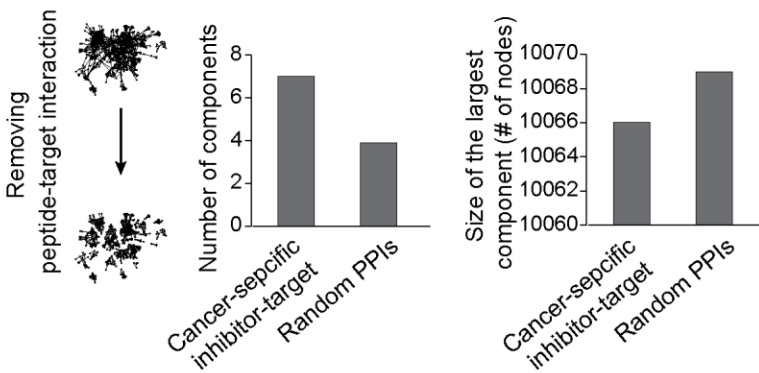

**Supplementary Fig. 3. Network topological properties of peptide-target interactions.** (A) Edge-betweenness of cancer-specific inhibitor-target interactions and other types of interactions. Data represent mean values  $\pm$  s.d. (B) Change of number of components and size of the largest component in network by removing cancer-specific inhibitor-target interactions.



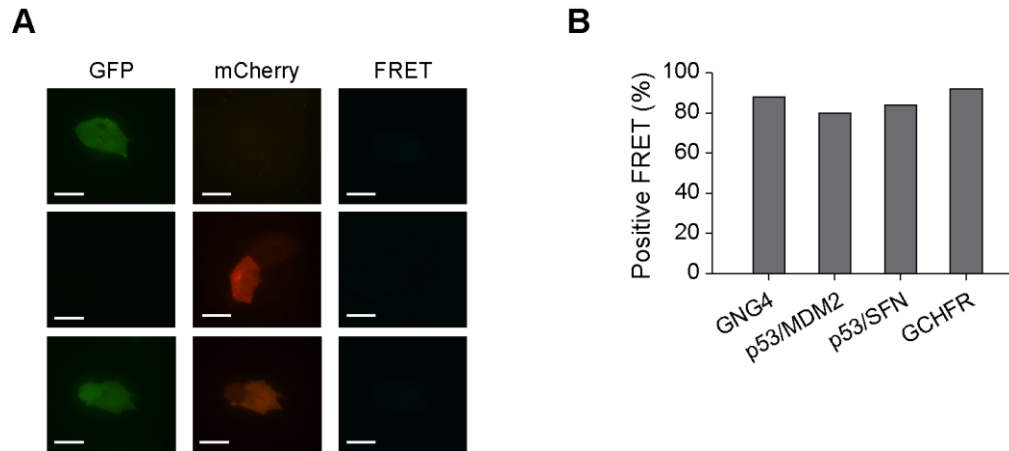

**Supplementary Fig. 4. Characterization of peptide-target interactions using FRET.** (A) FRET signal of controls. Upper images represent GFP alone, middle images represent mCherry alone, and bottom images represent GFP and mCherry in the same cell. White scale bars represent 15  $\mu$ m. (B) Quantification of positive FRET signal. Counting 25 individual cells in each microscopic image, we observe positive signal between the peptides and their putative target in over 80% of cells.

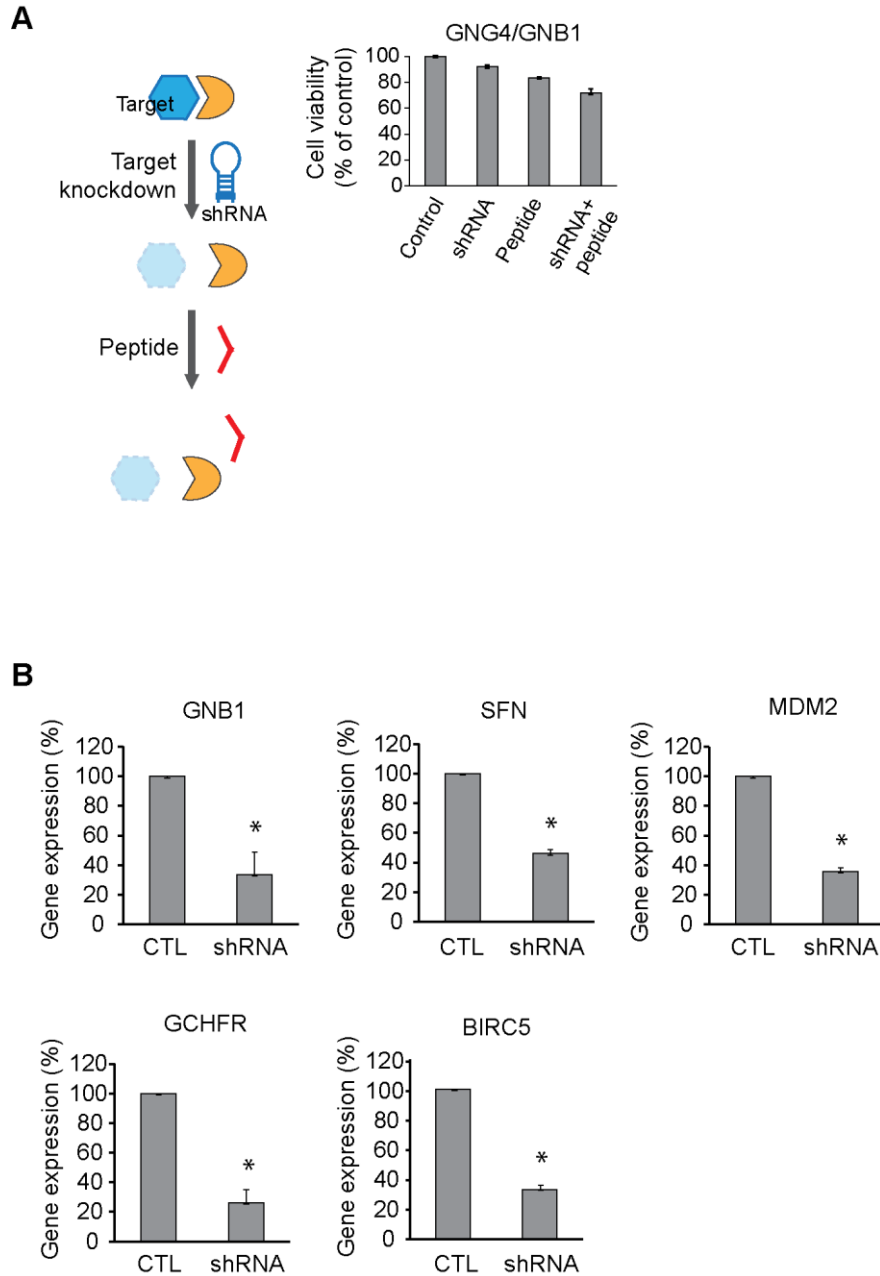

**Supplementary Fig. 5. Experimental validation of cancer-specific peptide-target**

**interactions.** (A) shRNA-induced cell viability rescue experiment. Cell viabilities are measured with cells stably expressing shRNA or transfected with the peptide. For the rescue experiment, cells stably expressing shRNA are transfected with the peptide. Experiments were done in triplicate. Data represent mean values  $\pm$  s.d. (B) Change of gene expression level after shRNA knockdown. Gene expression of target protein is measured with cells stably expressing shRNA.

\* P-value < 0.05. Experiments were done in triplicate. Data represent mean values  $\pm$  s.d.

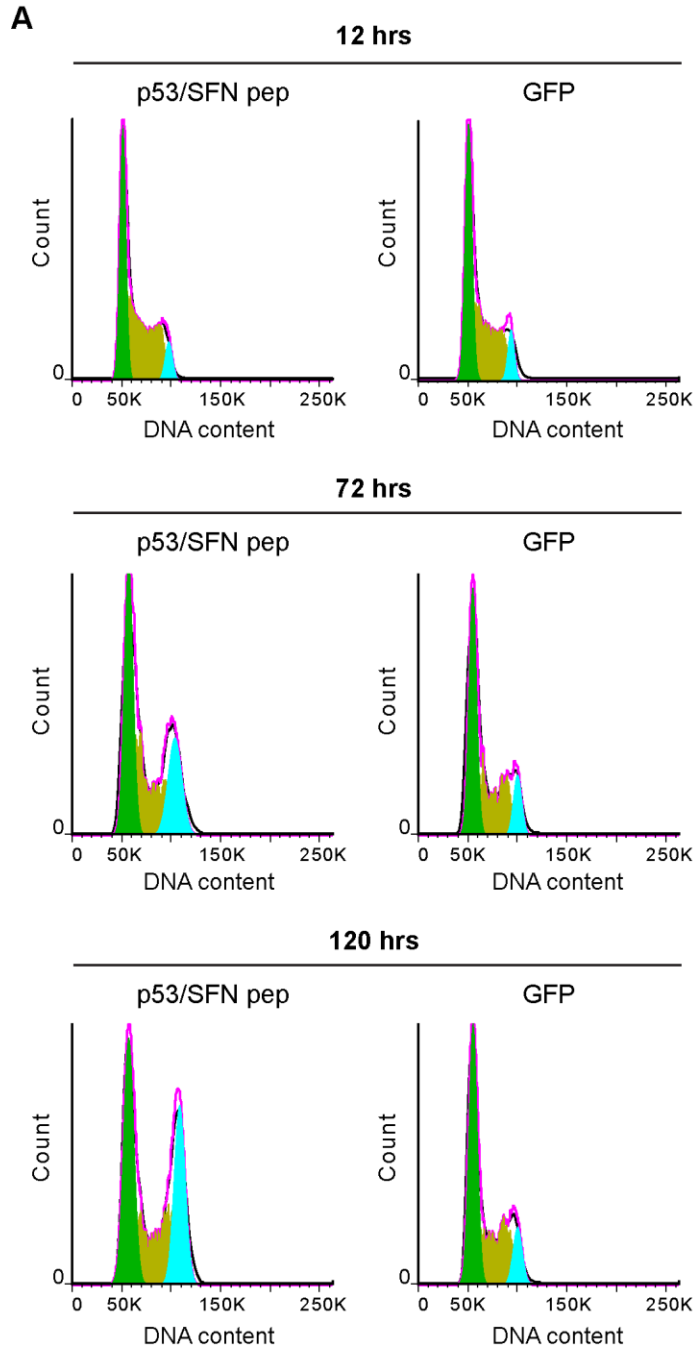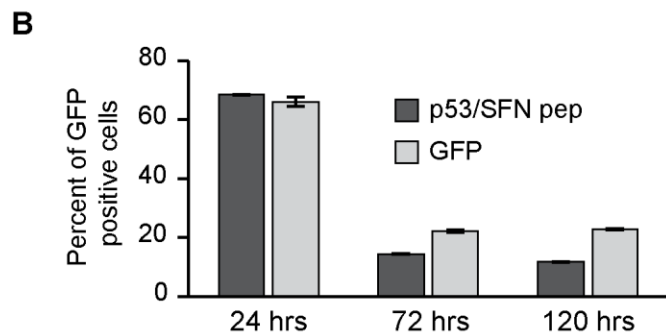

**Supplementary Fig. 6. Time-dependent effect of SFN peptide on cell cycle.**

(A) Cells are transfected with the peptide and stained with DAPI for FACS analysis of cell cycle. The effect of 24 hours, 72

hours and 120 hours are shown. (B) Percent of GFP positive cells at different

time points. Experiments were done in triplicate. Data represent mean values  $\pm$

s.d.

s.d.

s.d.

s.d.

s.d.

s.d.

s.d.

s.d.

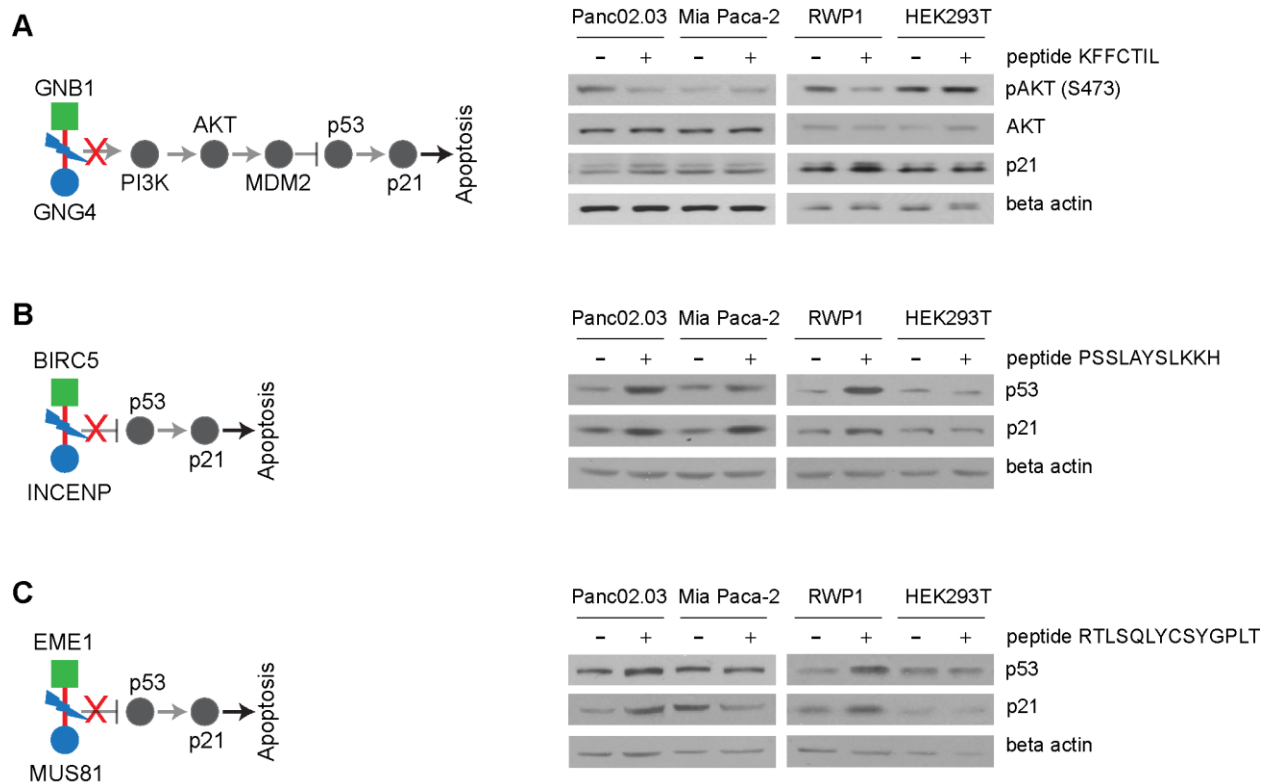

**Supplementary Fig. 7. Mechanism of action of cancer-specific peptides (GNG4, INCENP and MUS81)-target (GNB1, BIRC5 and EME1) interaction.** (A) KFFCTIL (inhibiting GNG4/GNB1). Expression of this peptide leads to a decrease in AKT activity (as measured by AKT phosphorylation at S473) and subsequently an increase in P21 levels, suggesting it triggers apoptosis. (B) PSSLAYSLKKH (inhibiting INCENP/BIRC5) and (C) RTLSQLYCSYGPLT (inhibiting MUS81/EME1) induce an increase in P53 and P21 levels, suggesting they lead to apoptosis. All experiments were done in triplicate. Full gel images in Supplementary Fig. 11.

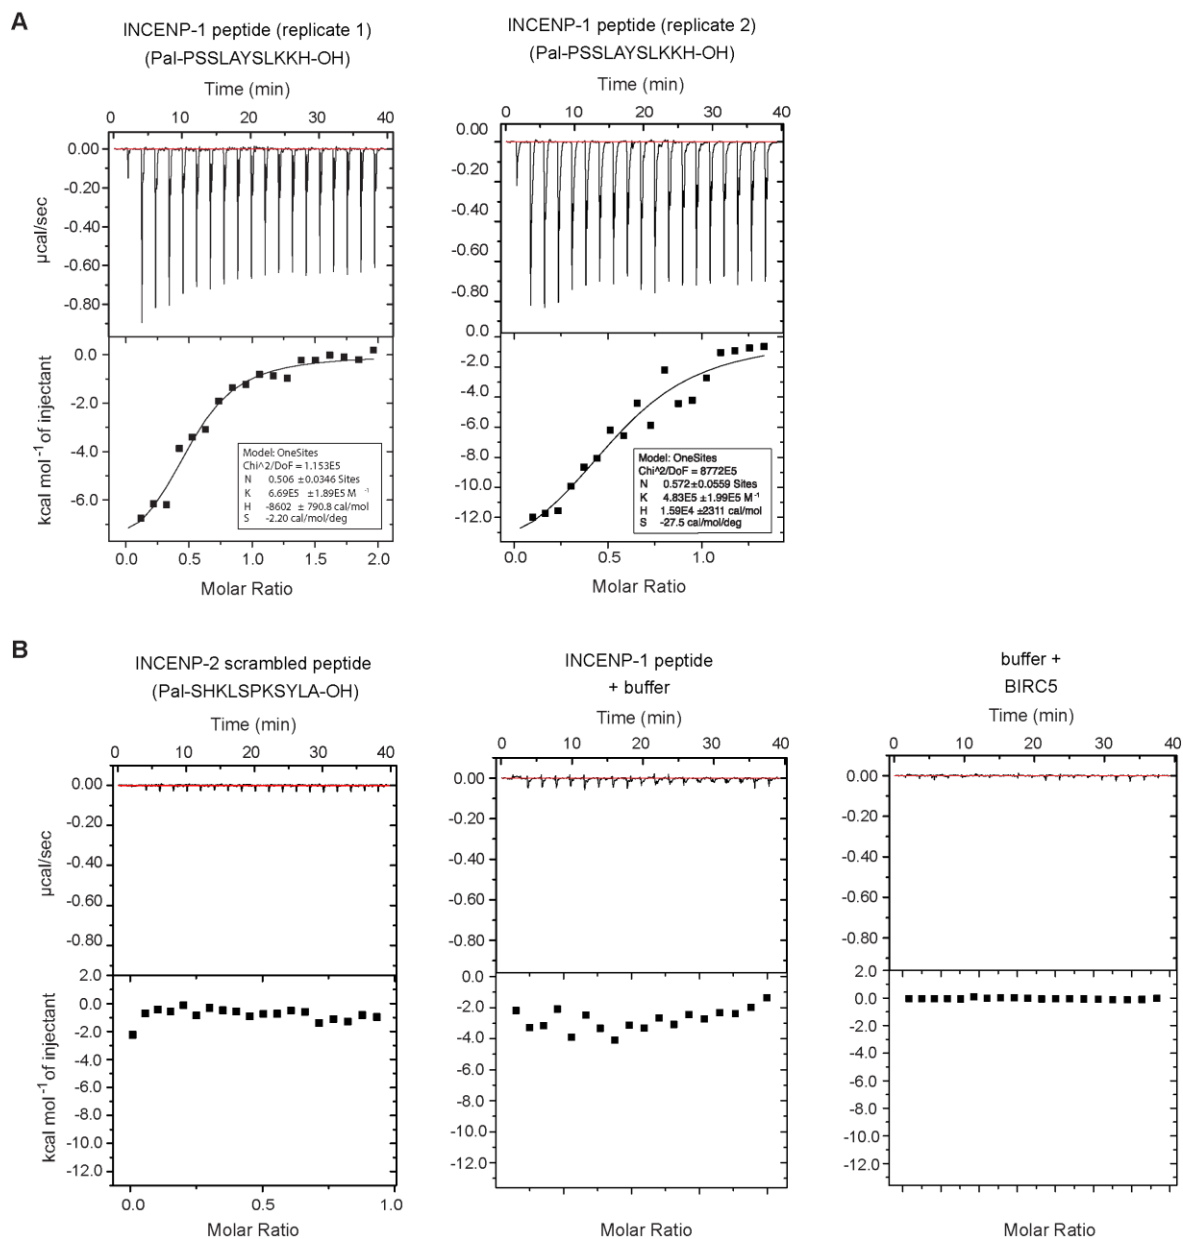

**Supplementary Fig. 8. ITC validation of INCENP peptide binding to BIRC5.** (A) The binding of the INCENP peptide can be fit to a  $K_d \approx 1.49 \pm 0.42 \mu\text{M}$  (replicate 1) and  $K_d \approx 2.07 \pm 1.03 \mu\text{M}$  (replicate 2). Experiments were done in quadruplicate. (B) The scrambled peptide displays no detectable binding. Titration of the peptide into buffer and buffer titration into the protein (BIRC5) are shown.

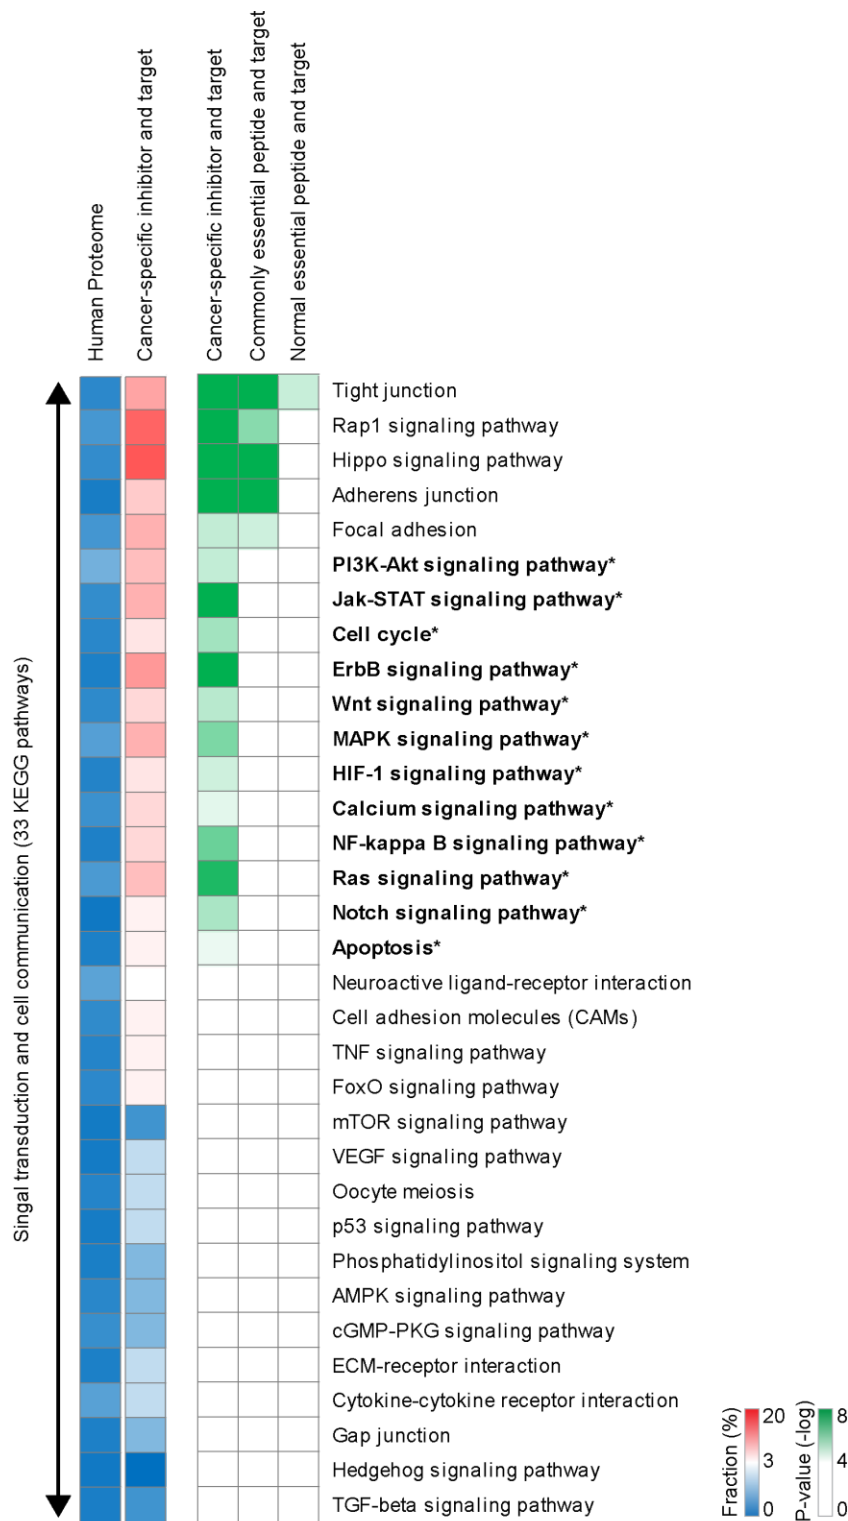

**Supplementary Fig. 9.**  
**Enriched pathways of cancer-specific inhibitors and their interacting targets.** Proportion of cancer-specific inhibitors and their targets in each pathway is graded from red (high) to blue (low). Enrichment of pathways in cancer-related inhibitors/targets, common dropout peptide/targets and normal-specific peptide/targets are graded from green (enriched) to white (not enriched).

\* Enriched kegg pathways in cancer-specific inhibitor-target interactions (P-value < 10<sup>-4</sup>)

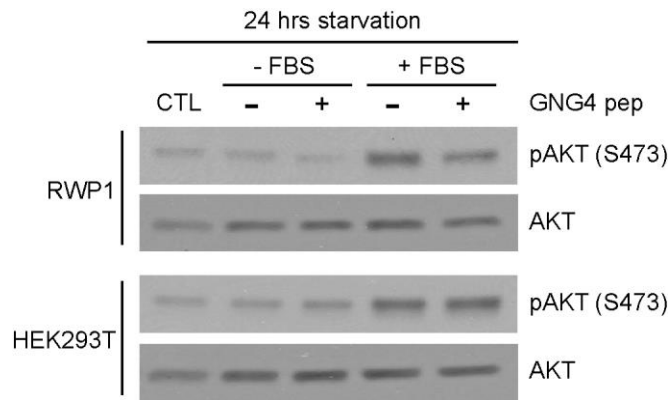

**Supplementary Fig. 10. GNG4 peptide inhibits AKT phosphorylation induced by serum stimulation in RWP1.** Cells are starved for 24 hours and 10% FBS is added for 20 min for induction of AKT phosphorylation. Experiments were done in duplicate. Full gel images in Supplementary Fig. 11.

Fig. 3B

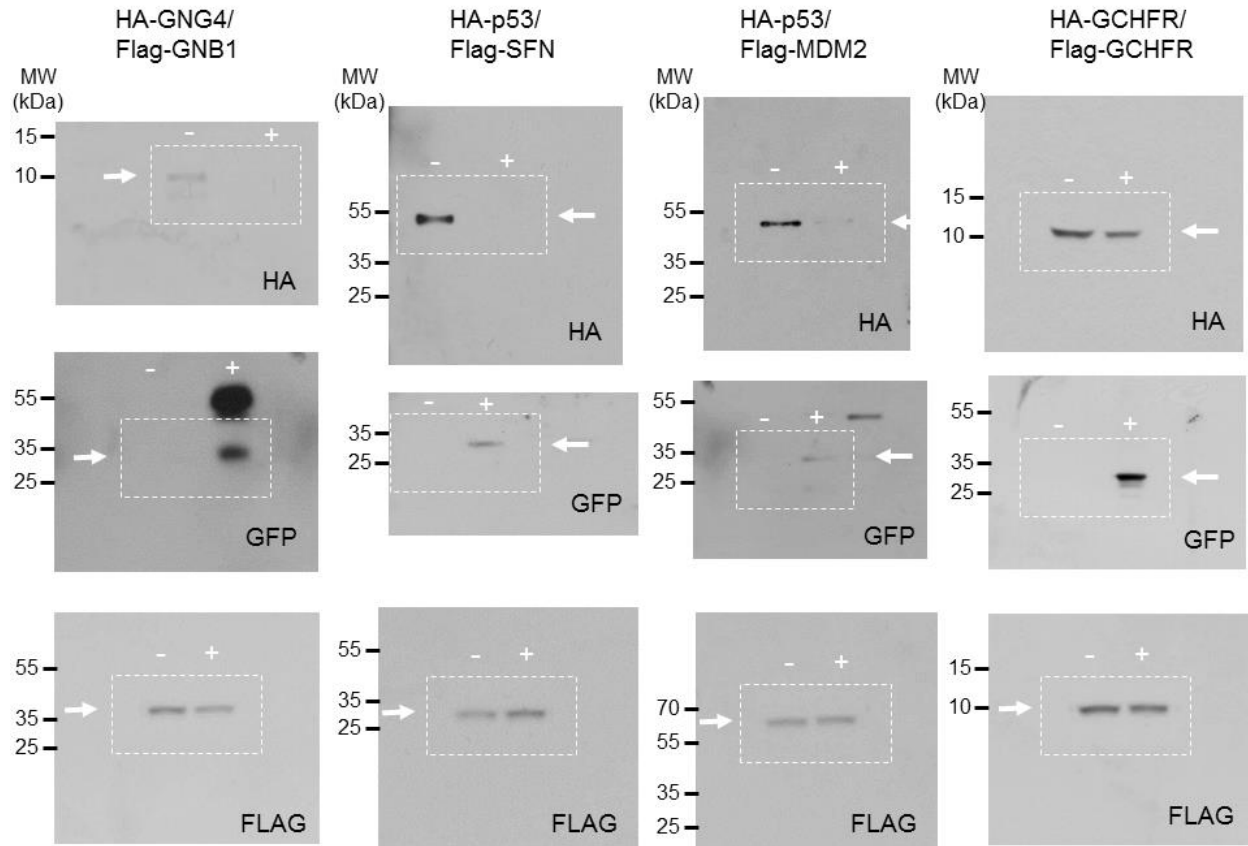

Supplementary Fig. 11. Full-size images of blots and gels (continue to next page)



Fig. 3B

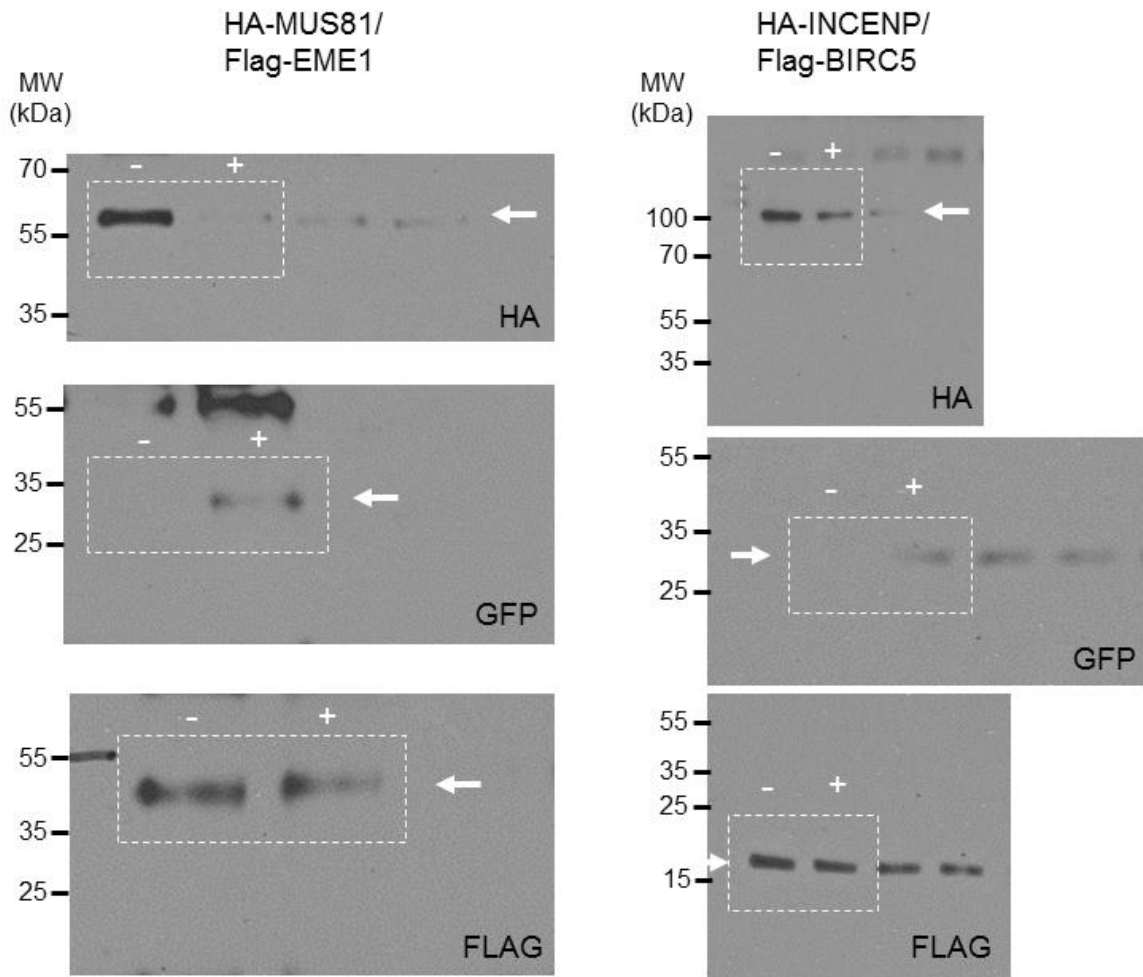

Supplementary Fig. 11. Full-size images of blots and gels (continue to next page)

Fig. 4A p53/MDM2

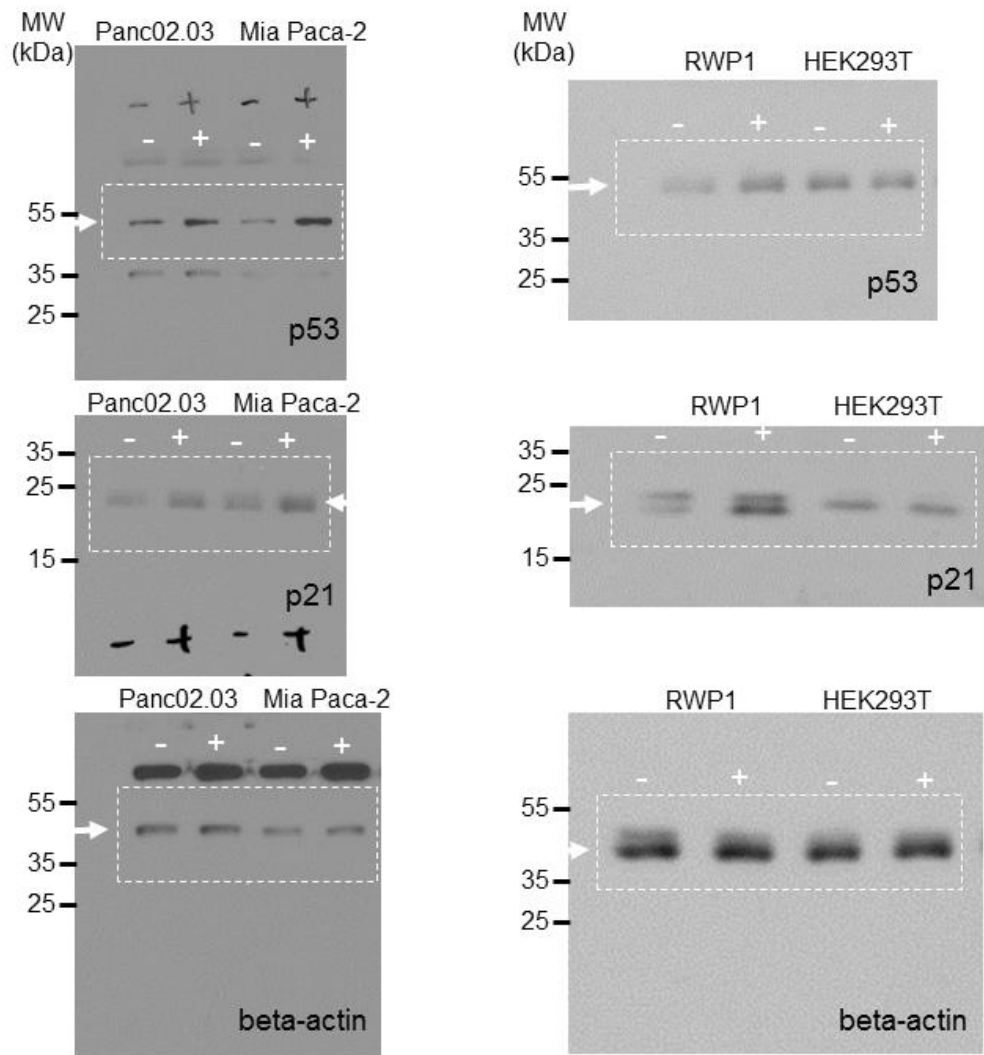

Supplementary Fig. 11. Full-size images of blots and gels (continue to next page)

Fig. 4B p53/SFN

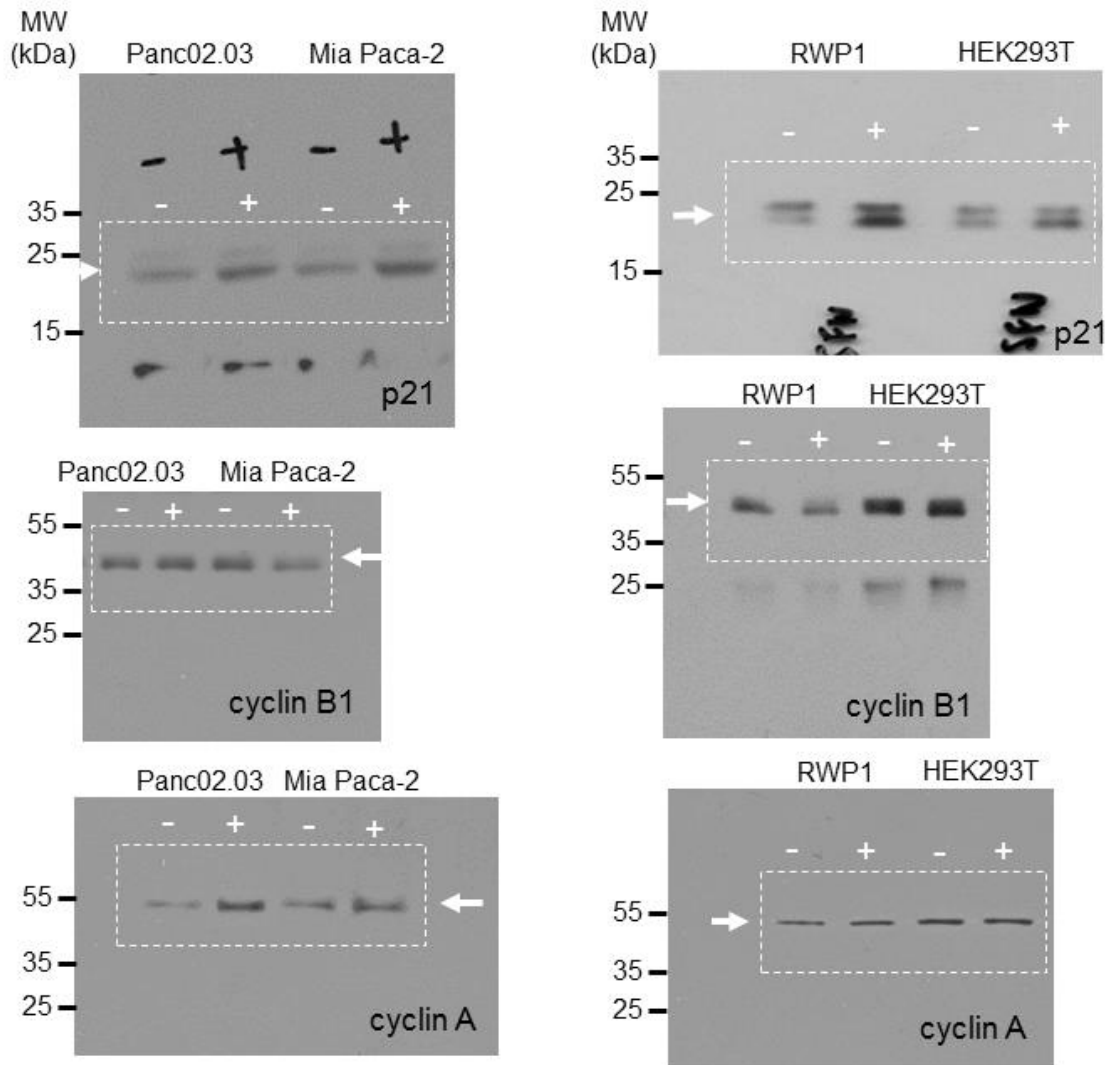

Supplementary Fig. 11. Full-size images of blots and gels (continue to next page)

Fig. 4B p53/SFN

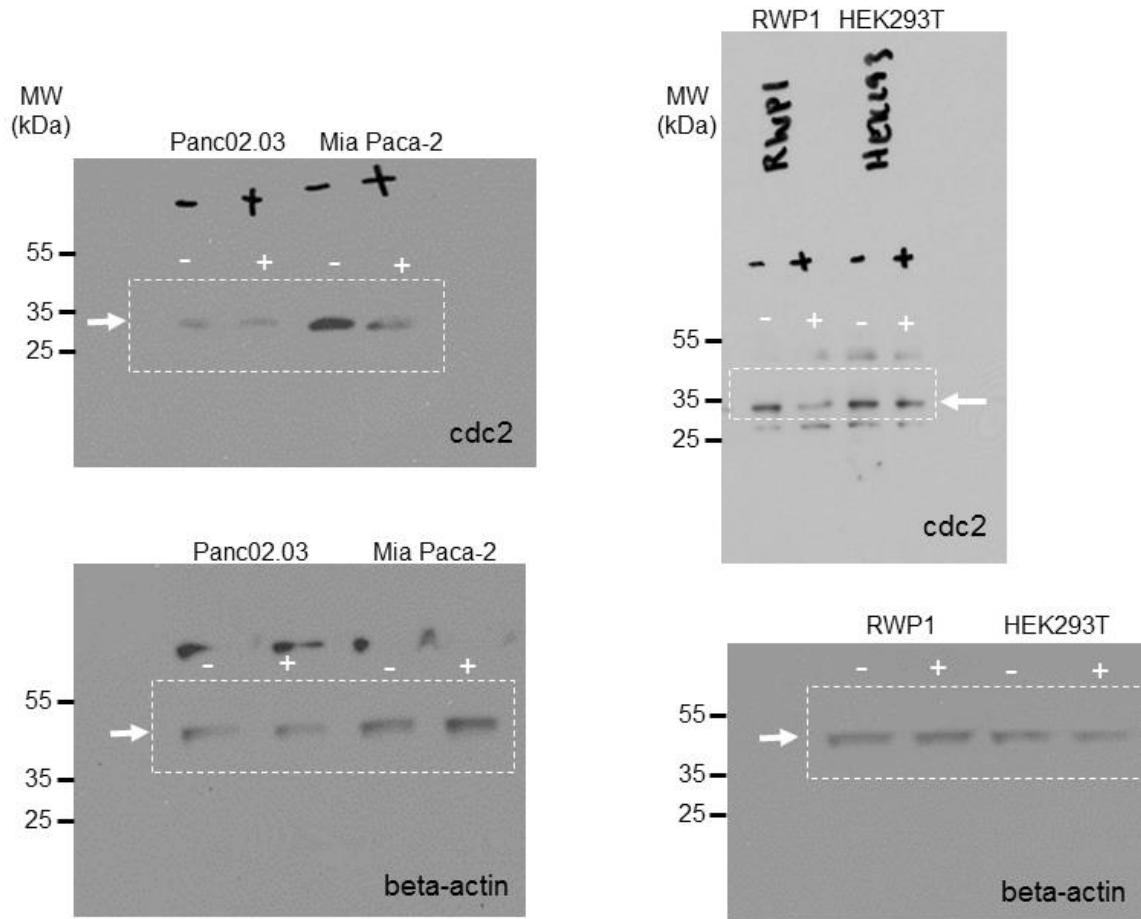

Supplementary Fig. 11. Full-size images of blots and gels (continue to next page)

Supp Fig. 7A GNG4/GNB1

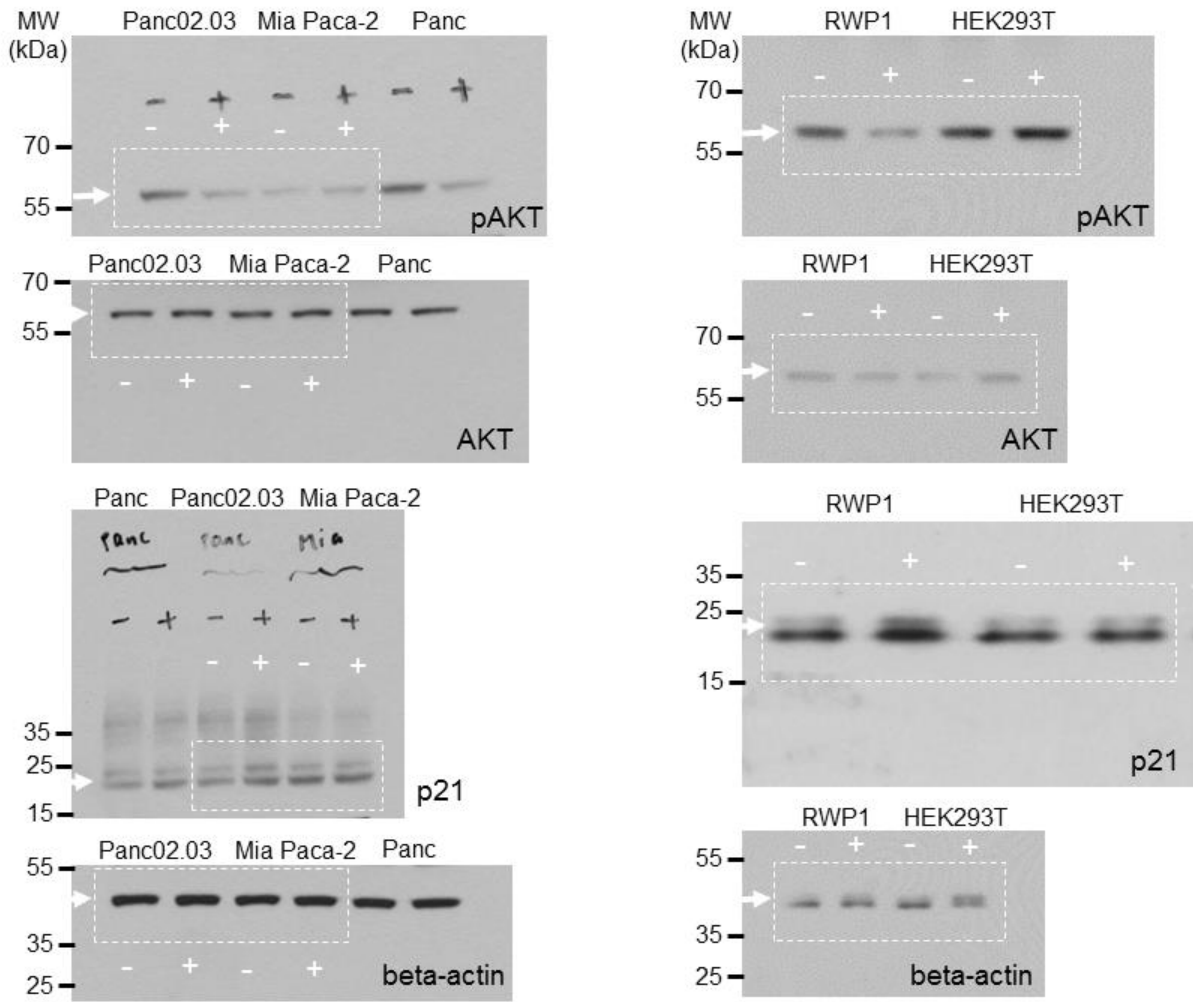

Supplementary Fig. 11. Full-size images of blots and gels (continue to next page)

Supp Fig. 7B BIRC5/INCENP

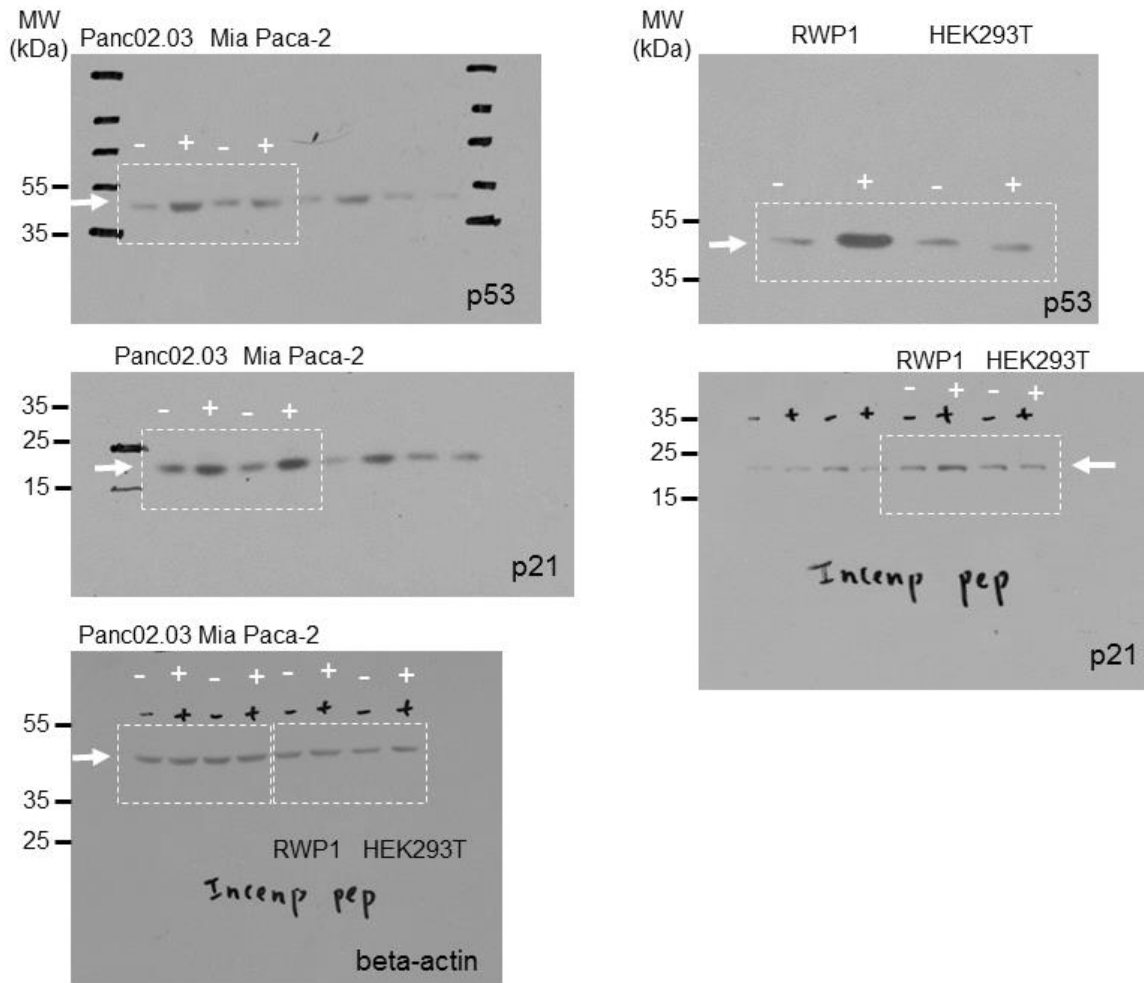

Supplementary Fig. 11. Full-size images of blots and gels (continue to next page)

Supp Fig. 7C EME1/MUS81

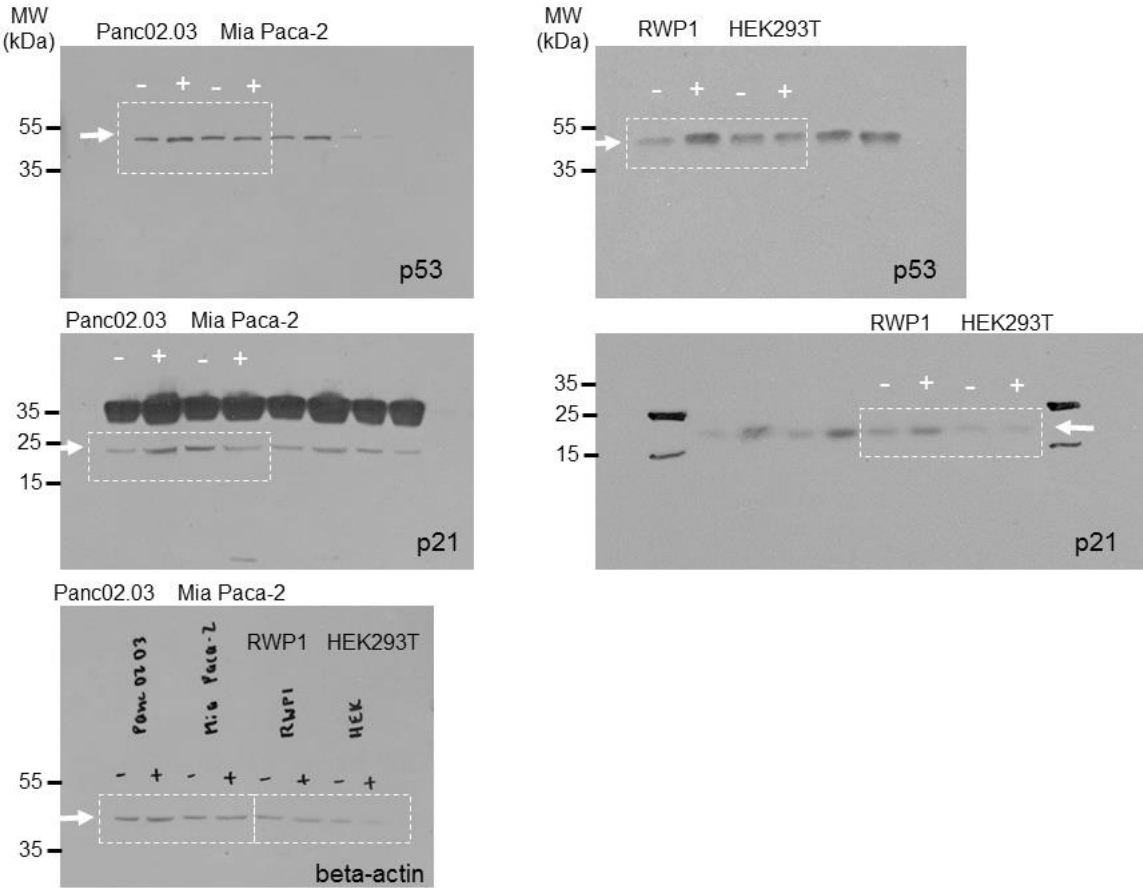

Supplementary Fig. 11. Full-size images of blots and gels (continue to next page)

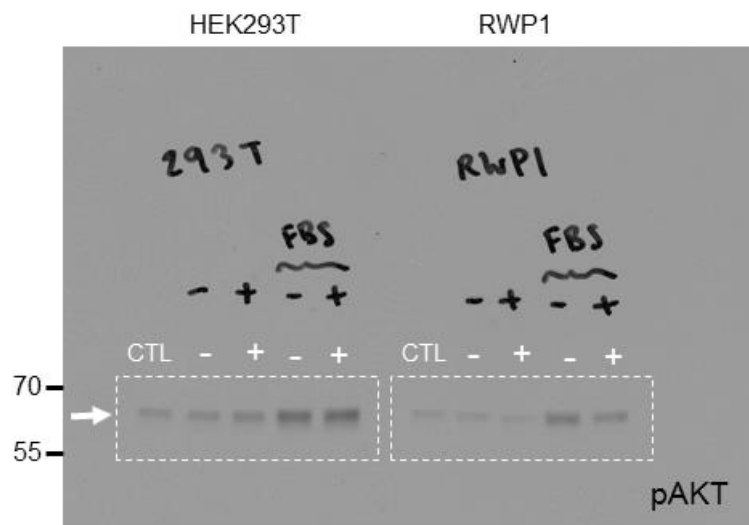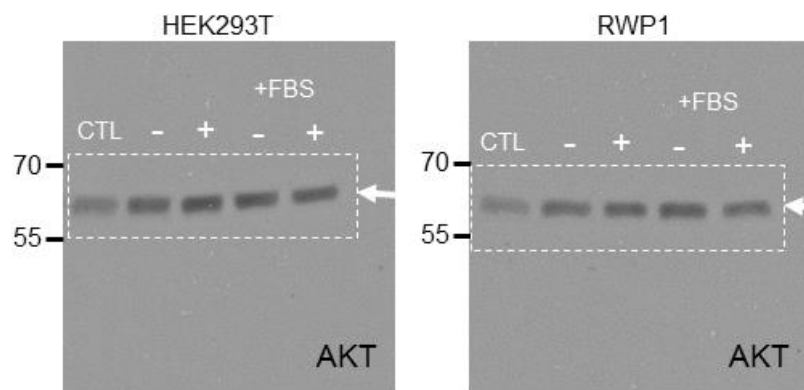

Supplementary Fig. 11. Full-size images of blots and gels.



## Supplementary Datasets

**Supplementary Dataset 1.** The list of human peptides for dropout screen and their effect on cell viability. Dropout scores of 50,549 peptides in two cell lines and identified number of reads are presented.

**Supplementary Dataset 2.** A list of cancer-specific inhibitors. Peptides that show dropout (dropout score  $< -2.5$ ) in RWP1 cells but do not show any change in HEK293T cells ( $-1 < \text{dropout score} < 1$ ) are considered as cancer-specific inhibitors.

**Supplementary Dataset 3.** Peptide-target interactions. Potential targets of peptides are identified based on structural evidences and peptide linear motifs. Pubmed IDs are shown when targets have been reported their cancer-related function.
